# Supplementary material
Source: PubMed Central journal article supplement (PMC4398313)

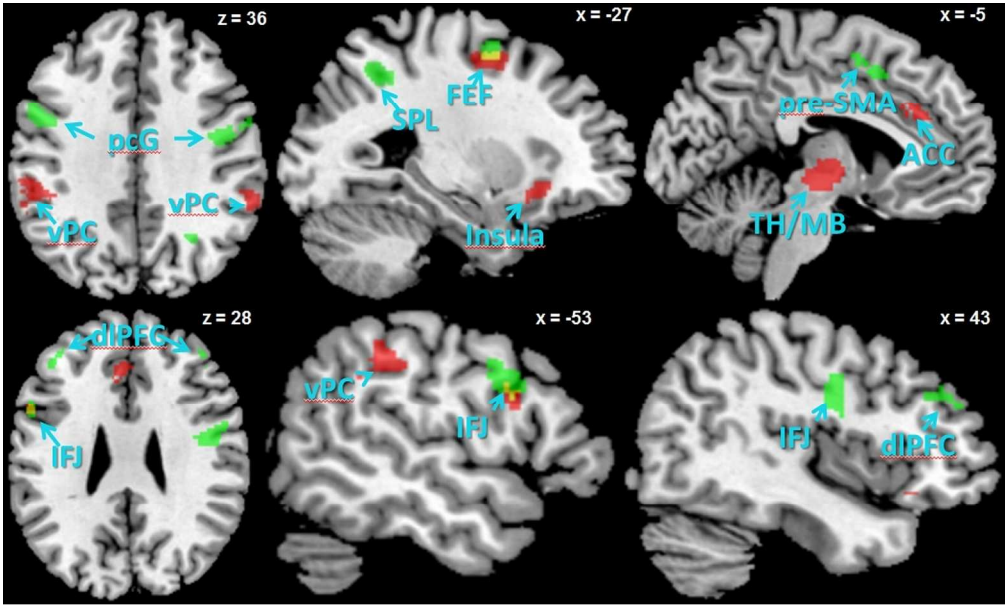

276x166mm (300 x 300 DPI)

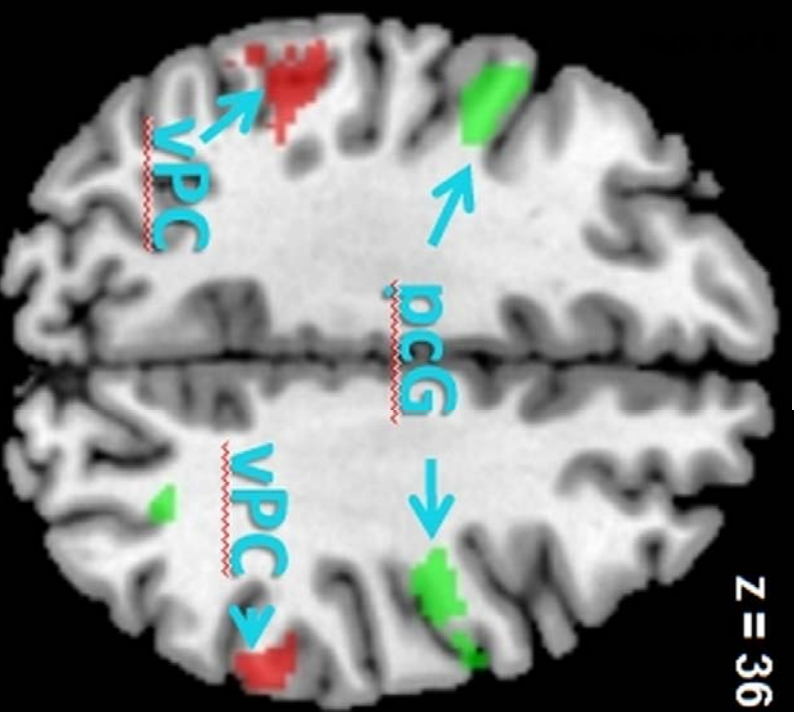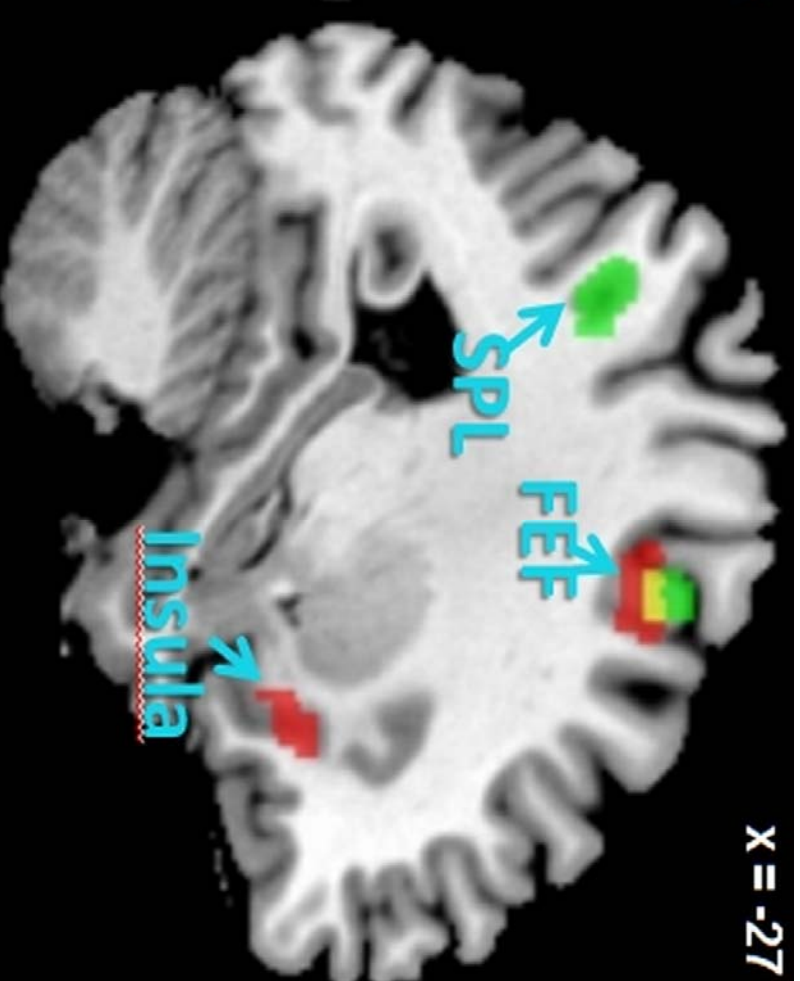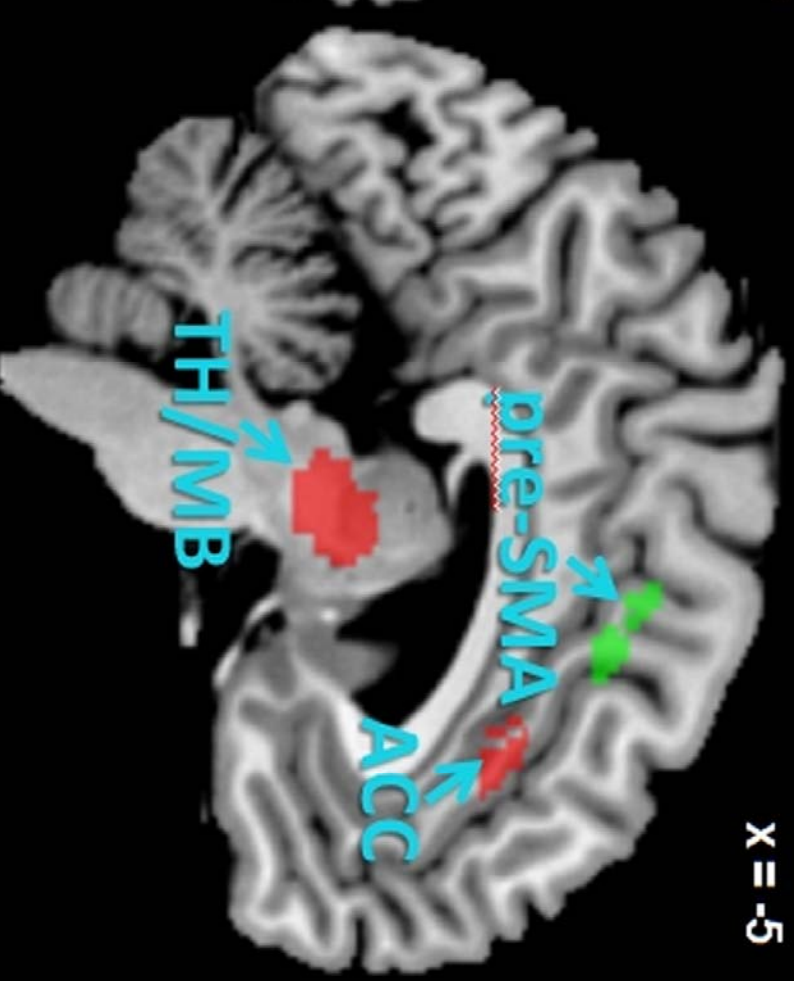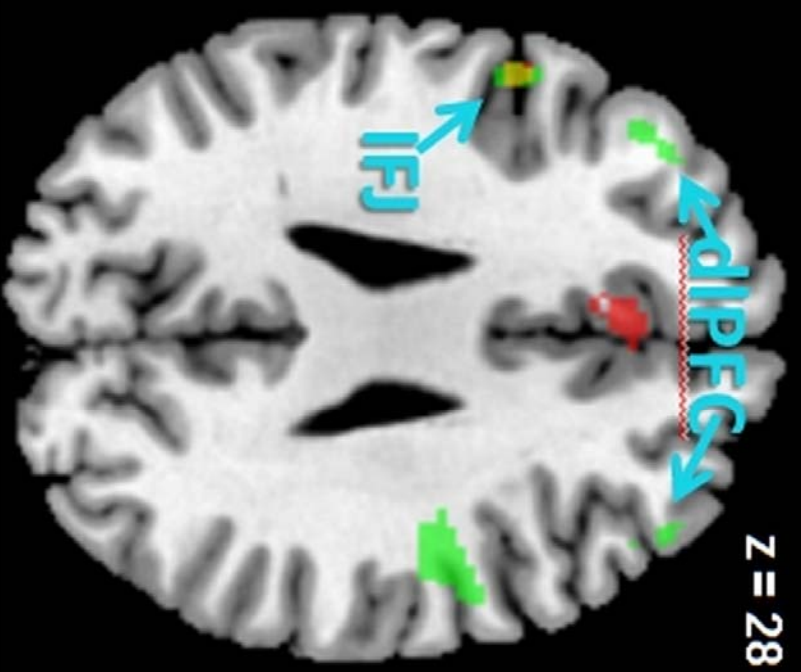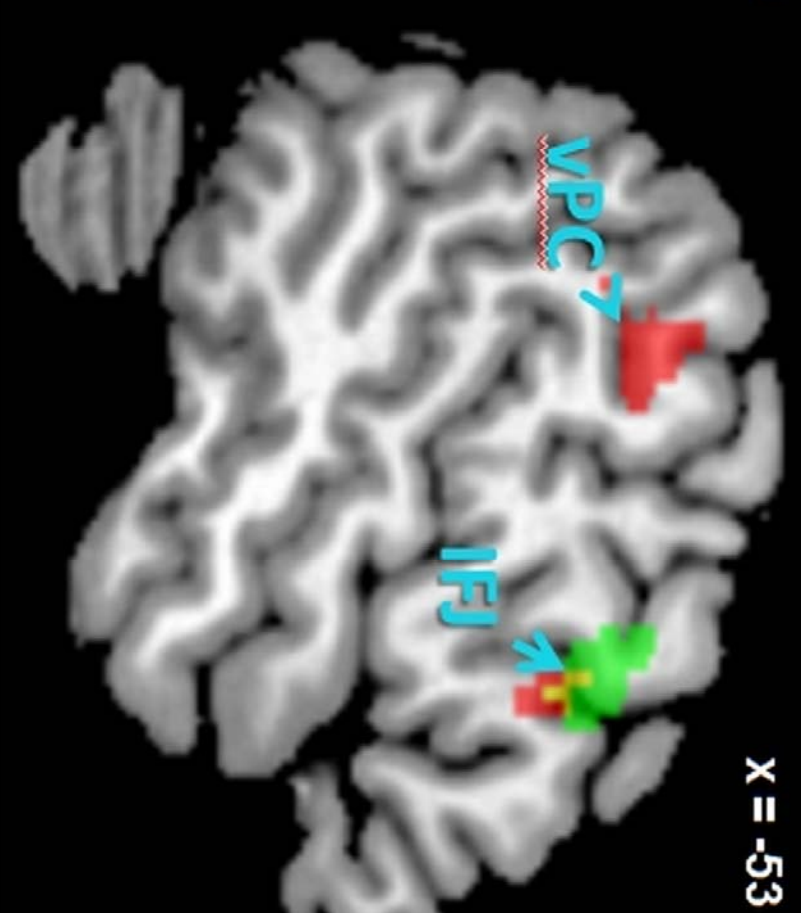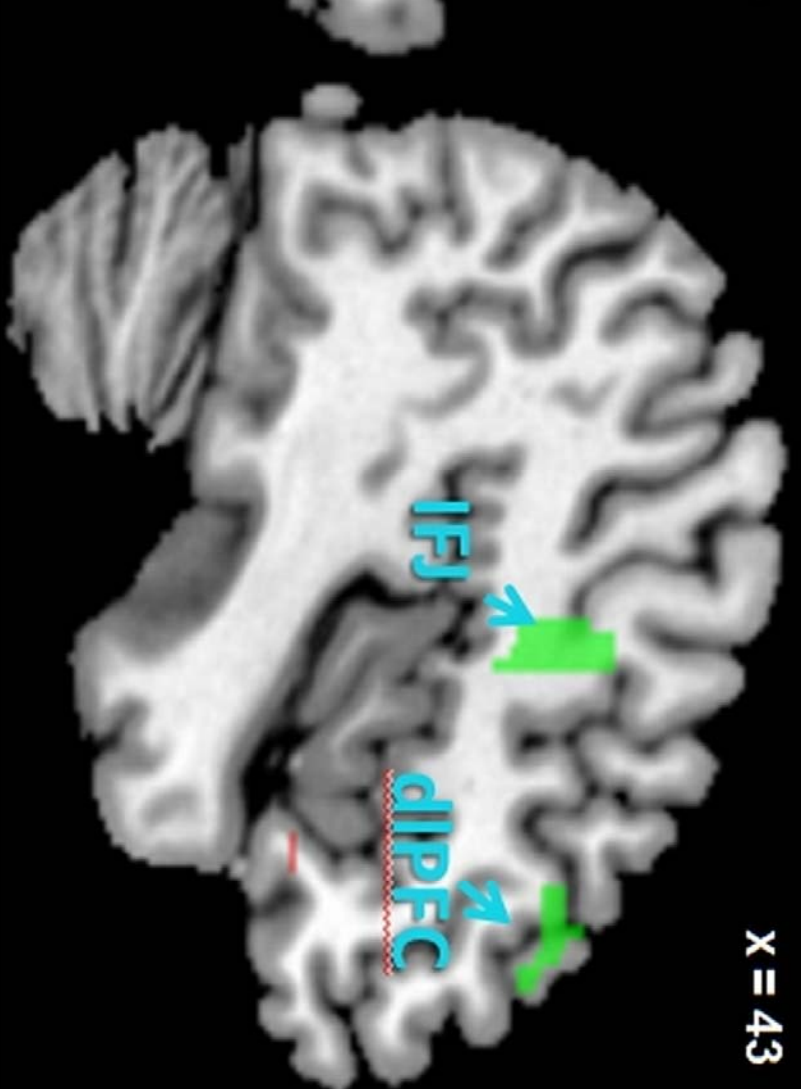

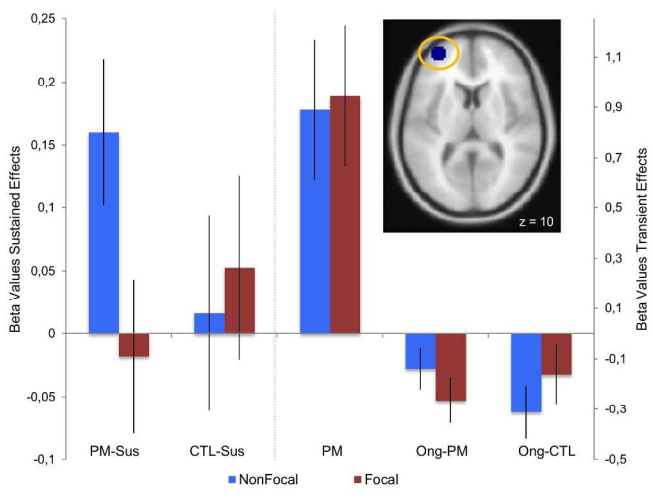

254x190mm (300 x 300 DPI)

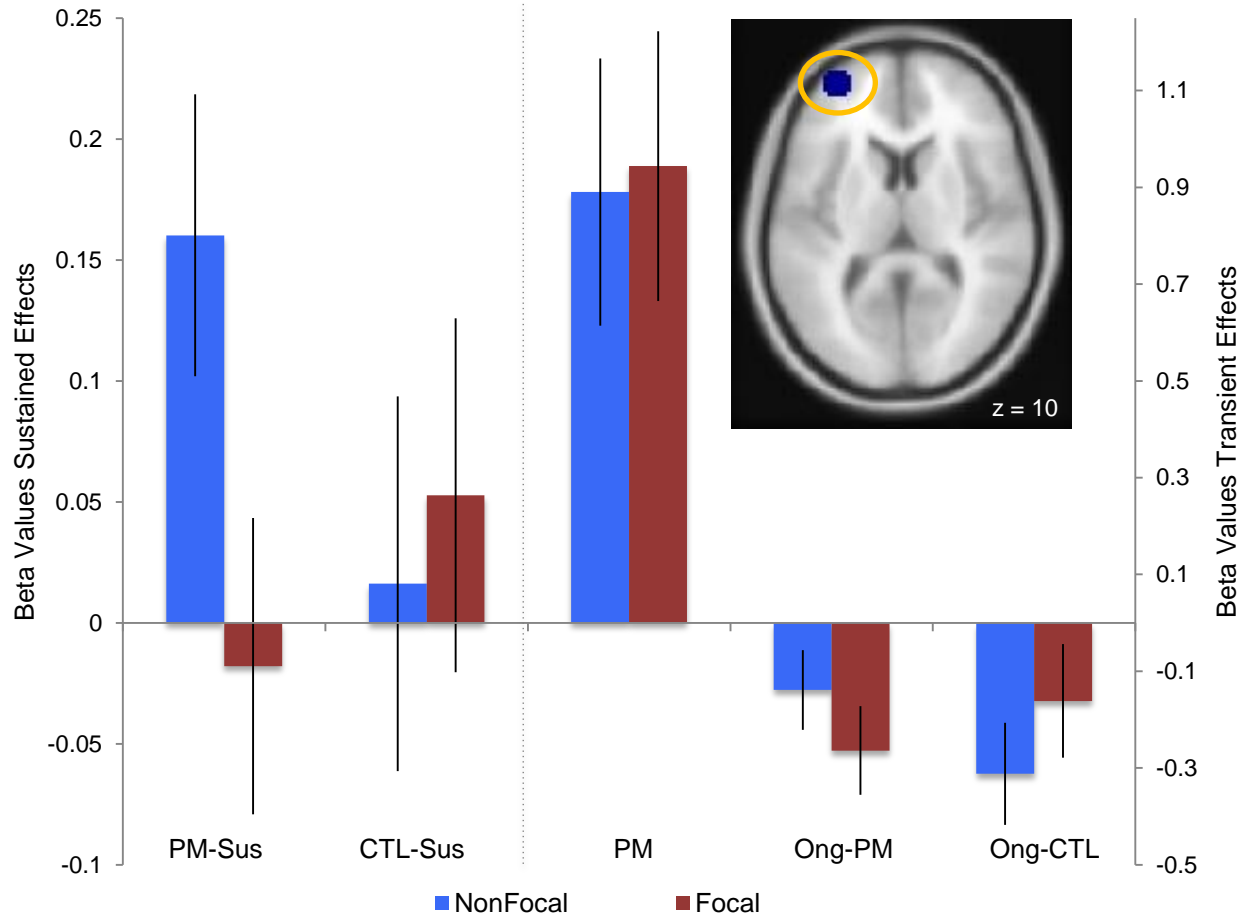

a PPI effects with left aPFC for PM trials

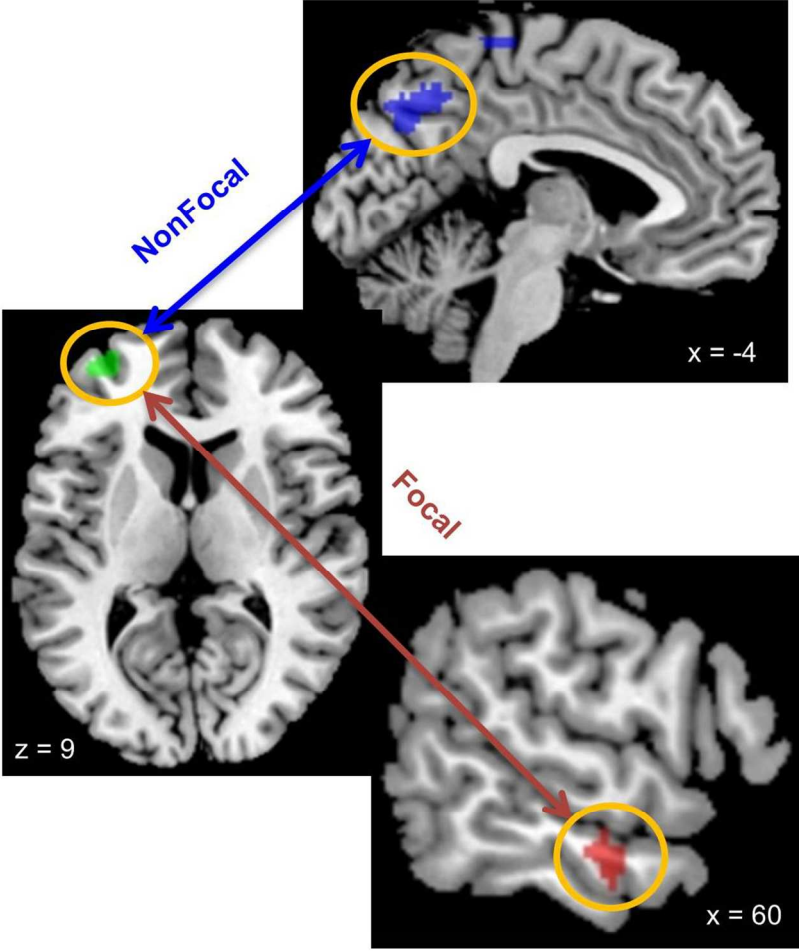

95x137mm (300 x 300 DPI)

## a PPI effects with left aPFC for PM trials

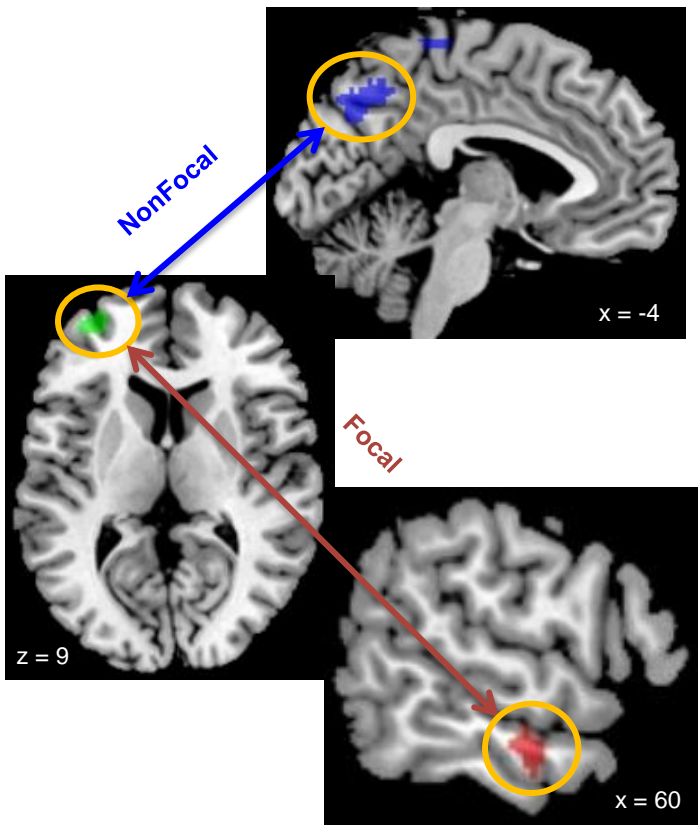

**b** PPI & transient effects in Precuneus

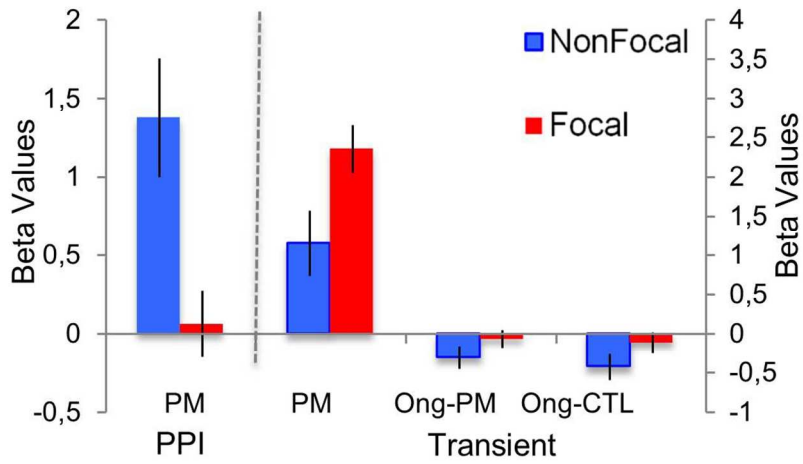

**c** PPI & transient effects in right TC

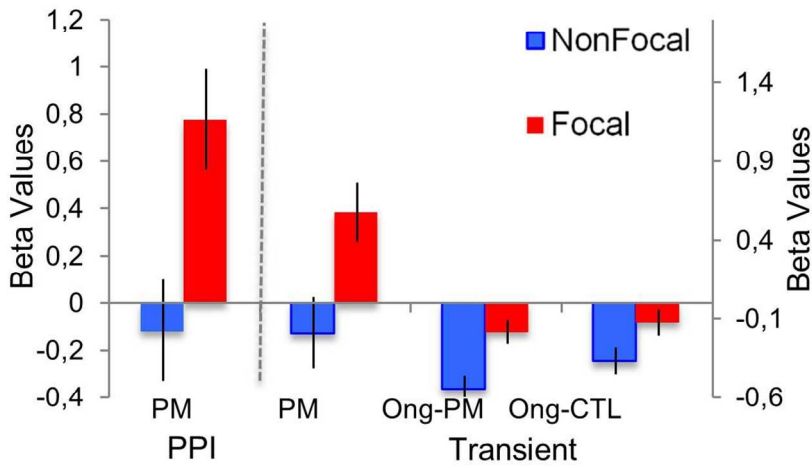

## b PPI & transient effects in Precuneus

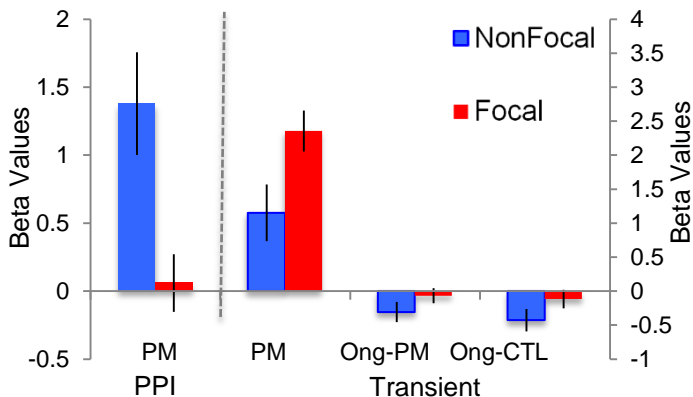

## c PPI & transient effects in right TC

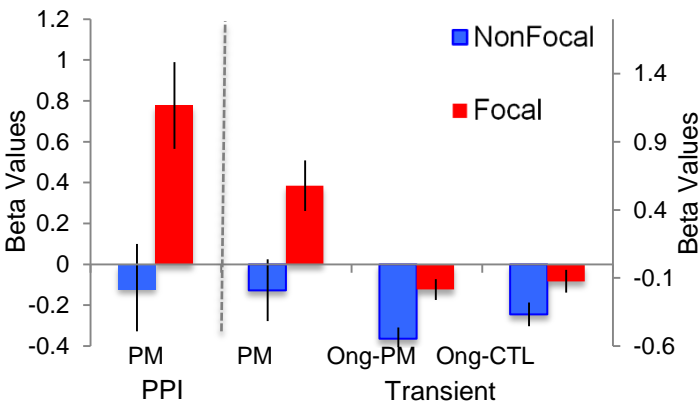

Supplement: NIHMS624848-supplement-supp_file.pdf [file NIHMS624848-supplement-supp_file.pdf]
